# Supplementary material for: Optimization of Lyophilized Hyperacute Serum (HAS) as a Regenerative Therapeutic in Osteoarthritis
Source: MDPI journal article supplement (doi:10.3390/ijms22147496), 2021-07-13
Supplement: s1 [file s1]

**Table S1:** Complete list of p-values of the supernatant fluids analysis corresponding to Figure 4. Inflamed control (IC).

|                | FCS vs FCS+HA | FCS vs HAS | HAS vs HAS+HA | FCS+HA vs HAS+HA | IC vs FCS | IC vs FCS+HA | IC vs HAS | IC vs HAS+HA |
|----------------|---------------|------------|---------------|------------------|-----------|--------------|-----------|--------------|
| PDGF-BB        | >0.999        | 0.231      | >0.999        | 0.231            | 0.080     | 0.250        | >0.999    | 0.485        |
| IL-12          | 0.196         | 0.048      | 0.525         | 0.062            | 0.331     | 0.331        | 0.331     | 0.331        |
| MIP-1 $\beta$  | 0.045         | 0.100      | 0.291         | 0.881            | >0.999    | 0.018        | 0.282     | 0.080        |
| IL-1Ra         | 0.258         | 0.082      | 0.464         | 0.540            | 0.252     | 0.070        | 0.252     | 0.252        |
| IL-6           | >0.999        | >0.999     | >0.999        | >0.999           | >0.999    | >0.999       | 0.485     | 0.786        |
| GM-CSF         | >0.999        | 0.045      | >0.999        | 0.823            | >0.999    | 0.485        | 0.018     | 0.039        |
| RANTES         | >0.999        | 0.107      | >0.999        | 0.455            | >0.999    | 0.786        | >0.999    | >0.999       |
| IL-2           | 0.214         | 0.034      | 0.719         | 0.419            | >0.999    | 0.373        | 0.036     | 0.080        |
| IL-9           | 0.939         | 0.242      | 0.482         | 0.217            | 0.282     | 0.155        | >0.999    | >0.999       |
| IL-10          | 0.373         | 0.622      | >0.999        | >0.999           | 0.009     | 0.009        | 0.009     | 0.009        |
| G-CSF          | >0.999        | 0.107      | >0.999        | 0.455            | >0.999    | >0.999       | 0.203     | 0.080        |
| IP-10          | 0.378         | 0.376      | 0.606         | 0.546            | 0.263     | 0.263        | 0.263     | 0.263        |
| IL-13          | 0.241         | 0.791      | 0.936         | 0.098            | 0.282     | 0.157        | 0.485     | 0.786        |
| VEGF           | 0.413         | 0.103      | 0.233         | 0.135            | >0.999    | >0.999       | 0.282     | >0.999       |
| IL-7           | 0.647         | 0.031      | 0.968         | 0.212            | 0.320     | 0.320        | 0.214     | 0.320        |
| IFN $\gamma$   | 0.823         | >0.999     | >0.999        | >0.999           | >0.999    | 0.373        | 0.056     | 0.056        |
| IL-8           | 0.311         | 0.142      | 0.173         | 0.401            | >0.999    | >0.999       | 0.786     | >0.999       |
| IL-1 $\beta$   | >0.999        | >0.999     | >0.999        | >0.999           | 0.485     | 0.080        | 0.282     | 0.155        |
| MIP-1 $\alpha$ | >0.999        | 0.786      | >0.999        | >0.999           | >0.999    | 0.282        | 0.080     | 0.039        |
| IL-15          | 0.994         | 0.045      | 0.173         | 0.065            | 0.122     | 0.122        | 0.122     | 0.122        |
| MCP-1          | >0.999        | 0.786      | >0.999        | 0.065            | 0.018     | 0.039        | 0.485     | >0.999       |
| BFGF           | 0.399         | 0.400      | 0.526         | 0.320            | 0.308     | 0.308        | 0.308     | 0.308        |
| IL-5           | 0.517         | 0.021      | 0.021         | 0.321            | 0.101     | 0.101        | 0.018     | 0.024        |
| IL-4           | >0.999        | 0.786      | >0.999        | >0.999           | 0.786     | 0.485        | 0.039     | 0.080        |
| IL-17          | >0.999        | 0.981      | >0.999        | >0.999           | >0.999    | 0.211        | 0.112     | 0.039        |
| TNF $\alpha$   | 0.282         | 0.038      | >0.999        | >0.999           | >0.999    | 0.039        | 0.080     | 0.155        |
| Eotaxin        | 0.566         | 0.304      | 0.894         | 0.092            | >0.999    | >0.999       | >0.999    | 0.786        |

Table S2: List of Pearson correlation values for the different conditions

FCS

|         | PDGF-BB | IL-12  | MIP-1β | IL-1ra | IL-6   | GM-CSF | RANTES | IL-2   | IL-9   | IL-10  | G-CSF  | IP-10  | IL-13  | VEGF   | IL-7   | IFNγ   | IL-8   | IL-1β  | MIP-1α | IL-15  | MCP-1 | BFGF  | IL-5  | IL-4  | IL-17 | TNFα  | Eotaxin |
|---------|---------|--------|--------|--------|--------|--------|--------|--------|--------|--------|--------|--------|--------|--------|--------|--------|--------|--------|--------|--------|-------|-------|-------|-------|-------|-------|---------|
| PDGF-BB | 1.000   |        |        |        |        |        |        |        |        |        |        |        |        |        |        |        |        |        |        |        |       |       |       |       |       |       |         |
| IL-12   | 0.950   | 1.000  |        |        |        |        |        |        |        |        |        |        |        |        |        |        |        |        |        |        |       |       |       |       |       |       |         |
| MIP-1β  | 0.902   | 0.992  | 1.000  |        |        |        |        |        |        |        |        |        |        |        |        |        |        |        |        |        |       |       |       |       |       |       |         |
| IL-1ra  | 0.914   | 0.995  | 1.000  | 1.000  |        |        |        |        |        |        |        |        |        |        |        |        |        |        |        |        |       |       |       |       |       |       |         |
| IL-6    | 0.786   | 0.940  | 0.976  | 0.969  | 1.000  |        |        |        |        |        |        |        |        |        |        |        |        |        |        |        |       |       |       |       |       |       |         |
| GM-CSF  | 0.619   | 0.833  | 0.897  | 0.884  | 0.972  | 1.000  |        |        |        |        |        |        |        |        |        |        |        |        |        |        |       |       |       |       |       |       |         |
| RANTES  | 0.535   | 0.772  | 0.847  | 0.831  | 0.943  | 0.995  | 1.000  |        |        |        |        |        |        |        |        |        |        |        |        |        |       |       |       |       |       |       |         |
| IL-2    | 0.520   | 0.761  | 0.838  | 0.821  | 0.937  | 0.993  | 1.000  | 1.000  |        |        |        |        |        |        |        |        |        |        |        |        |       |       |       |       |       |       |         |
| IL-9    | 0.453   | 0.709  | 0.793  | 0.775  | 0.908  | 0.981  | 0.996  | 0.997  | 1.000  |        |        |        |        |        |        |        |        |        |        |        |       |       |       |       |       |       |         |
| IL-10   | 0.484   | 0.733  | 0.814  | 0.797  | 0.922  | 0.987  | 0.998  | 0.999  | 0.999  | 1.000  |        |        |        |        |        |        |        |        |        |        |       |       |       |       |       |       |         |
| G-CSF   | 0.505   | 0.749  | 0.828  | 0.811  | 0.931  | 0.990  | 0.999  | 1.000  | 0.998  | 1.000  | 1.000  |        |        |        |        |        |        |        |        |        |       |       |       |       |       |       |         |
| IP-10   | 0.651   | 0.856  | 0.915  | 0.903  | 0.981  | 0.999  | 0.990  | 0.987  | 0.972  | 0.979  | 0.984  | 1.000  |        |        |        |        |        |        |        |        |       |       |       |       |       |       |         |
| IL-13   | 0.283   | 0.568  | 0.669  | 0.647  | 0.816  | 0.928  | 0.962  | 0.966  | 0.983  | 0.976  | 0.971  | 0.912  | 1.000  |        |        |        |        |        |        |        |       |       |       |       |       |       |         |
| VEGF    | 0.981   | 0.871  | 0.801  | 0.818  | 0.651  | 0.455  | 0.361  | 0.345  | 0.272  | 0.305  | 0.328  | 0.491  | 0.091  | 1.000  |        |        |        |        |        |        |       |       |       |       |       |       |         |
| IL-7    | 0.971   | 0.847  | 0.772  | 0.790  | 0.614  | 0.411  | 0.316  | 0.299  | 0.225  | 0.259  | 0.282  | 0.449  | 0.043  | 0.999  | 1.000  |        |        |        |        |        |       |       |       |       |       |       |         |
| IFNγ    | 0.939   | 0.785  | 0.699  | 0.720  | 0.525  | 0.311  | 0.212  | 0.195  | 0.119  | 0.154  | 0.177  | 0.351  | -0.064 | 0.988  | 0.994  | 1.000  |        |        |        |        |       |       |       |       |       |       |         |
| IL-8    | 0.802   | 0.575  | 0.466  | 0.491  | 0.260  | 0.027  | -0.075 | -0.093 | -0.169 | -0.134 | -0.111 | 0.069  | -0.346 | 0.903  | 0.922  | 0.958  | 1.000  |        |        |        |       |       |       |       |       |       |         |
| IL-1β   | 0.582   | 0.299  | 0.175  | 0.203  | -0.046 | -0.279 | -0.375 | -0.392 | -0.461 | -0.430 | -0.408 | -0.238 | -0.615 | 0.729  | 0.761  | 0.826  | 0.953  | 1.000  |        |        |       |       |       |       |       |       |         |
| MIP-1α  | -0.972  | -0.997 | -0.979 | -0.984 | -0.910 | -0.787 | -0.720 | -0.708 | -0.651 | -0.678 | -0.695 | -0.812 | -0.502 | -0.907 | -0.886 | -0.831 | -0.638 | -0.373 | 1.000  |        |       |       |       |       |       |       |         |
| IL-15   | -0.999  | -0.960 | -0.916 | -0.927 | -0.806 | -0.645 | -0.563 | -0.548 | -0.483 | -0.513 | -0.533 | -0.676 | -0.315 | -0.974 | -0.962 | -0.927 | -0.782 | -0.555 | 0.979  | 1.000  |       |       |       |       |       |       |         |
| MCP-1   | -0.730  | -0.907 | -0.953 | -0.944 | -0.996 | -0.989 | -0.968 | -0.963 | -0.940 | -0.951 | -0.958 | -0.994 | -0.862 | -0.584 | -0.544 | -0.451 | -0.177 | 0.131  | 0.871  | 0.752  | 1.000 |       |       |       |       |       |         |
| BFGF    | -0.755  | -0.922 | -0.964 | -0.956 | -0.999 | -0.982 | -0.958 | -0.953 | -0.927 | -0.939 | -0.947 | -0.989 | -0.842 | -0.614 | -0.575 | -0.484 | -0.214 | 0.093  | 0.889  | 0.777  | 0.999 | 1.000 |       |       |       |       |         |
| IL-5    | -0.340  | -0.617 | -0.712 | -0.692 | -0.849 | -0.949 | -0.976 | -0.980 | -0.992 | -0.987 | -0.984 | -0.935 | -0.998 | -0.151 | -0.104 | 0.004  | 0.289  | 0.567  | 0.553  | 0.371  | 0.891 | 0.873 | 1.000 |       |       |       |         |
| IL-4    | -0.224  | -0.517 | -0.622 | -0.599 | -0.779 | -0.904 | -0.943 | -0.949 | -0.970 | -0.961 | -0.954 | -0.885 | -0.998 | -0.030 | 0.017  | 0.125  | 0.403  | 0.662  | 0.448  | 0.256  | 0.829 | 0.808 | 0.993 | 1.000 |       |       |         |
| IL-17   | 0.052   | -0.262 | -0.383 | -0.356 | -0.577 | -0.752 | -0.815 | -0.825 | -0.866 | -0.848 | -0.836 | -0.724 | -0.943 | 0.245  | 0.291  | 0.392  | 0.639  | 0.843  | 0.185  | -0.019 | 0.644 | 0.615 | 0.921 | 0.962 | 1.000 |       |         |
| TNFα    | 0.146   | -0.170 | -0.294 | -0.266 | -0.497 | -0.686 | -0.757 | -0.768 | -0.815 | -0.794 | -0.780 | -0.655 | -0.907 | 0.336  | 0.380  | 0.478  | 0.708  | 0.890  | 0.092  | -0.114 | 0.569 | 0.538 | 0.880 | 0.931 | 0.996 | 1.000 |         |
| Eotaxin | 0.104   | -0.212 | -0.334 | -0.307 | -0.533 | -0.717 | -0.784 | -0.795 | -0.839 | -0.819 | -0.806 | -0.687 | -0.924 | 0.296  | 0.341  | 0.440  | 0.678  | 0.870  | 0.134  | -0.071 | 0.603 | 0.573 | 0.900 | 0.946 | 0.999 | 0.999 | 1.000   |

FCS + HA

|         | MIP-1β | IL-6   | IL-1ra | GM-CSF | IL-10  | RANTES | IL-9   | G-CSF  | PDGF-BB | MIP-1α | IL-2   | IL-1β  | Eotaxin | MCP-1  | IFNγ   | IP-10  | BFGF  | IL-4  | IL-15 | IL-13 | IL-8  | IL-17 | IL-12 | IL-7  | TNFα  | IL-5  | VEGF  |
|---------|--------|--------|--------|--------|--------|--------|--------|--------|---------|--------|--------|--------|---------|--------|--------|--------|-------|-------|-------|-------|-------|-------|-------|-------|-------|-------|-------|
| MIP-1β  | 1,000  |        |        |        |        |        |        |        |         |        |        |        |         |        |        |        |       |       |       |       |       |       |       |       |       |       |       |
| IL-6    | 0.995  | 1,000  |        |        |        |        |        |        |         |        |        |        |         |        |        |        |       |       |       |       |       |       |       |       |       |       |       |
| IL-1ra  | 0.995  | 1,000  | 1,000  |        |        |        |        |        |         |        |        |        |         |        |        |        |       |       |       |       |       |       |       |       |       |       |       |
| GM-CSF  | 0.999  | 0.998  | 0.998  | 1,000  |        |        |        |        |         |        |        |        |         |        |        |        |       |       |       |       |       |       |       |       |       |       |       |
| IL-10   | 0.987  | 0.998  | 0.998  | 0.992  | 1,000  |        |        |        |         |        |        |        |         |        |        |        |       |       |       |       |       |       |       |       |       |       |       |
| RANTES  | 0.973  | 0.991  | 0.991  | 0.981  | 0.997  | 1,000  |        |        |         |        |        |        |         |        |        |        |       |       |       |       |       |       |       |       |       |       |       |
| IL-9    | 0.863  | 0.908  | 0.908  | 0.881  | 0.933  | 0.956  | 1,000  |        |         |        |        |        |         |        |        |        |       |       |       |       |       |       |       |       |       |       |       |
| G-CSF   | 0.813  | 0.866  | 0.866  | 0.834  | 0.896  | 0.926  | 0.996  | 1,000  |         |        |        |        |         |        |        |        |       |       |       |       |       |       |       |       |       |       |       |
| PDGF-BB | 0.516  | 0.598  | 0.598  | 0.549  | 0.648  | 0.701  | 0.879  | 0.919  | 1,000   |        |        |        |         |        |        |        |       |       |       |       |       |       |       |       |       |       |       |
| MIP-1α  | 0.226  | 0.320  | 0.320  | 0.263  | 0.380  | 0.446  | 0.688  | 0.751  | 0.951   | 1,000  |        |        |         |        |        |        |       |       |       |       |       |       |       |       |       |       |       |
| IL-2    | -0.058 | 0.040  | 0.040  | -0.020 | 0.103  | 0.175  | 0.455  | 0.534  | 0.825   | 0.959  | 1,000  |        |         |        |        |        |       |       |       |       |       |       |       |       |       |       |       |
| IL-1β   | -0.260 | -0.353 | -0.353 | -0.297 | -0.412 | -0.477 | -0.712 | -0.774 | -0.961  | -0.999 | -0.949 | 1,000  |         |        |        |        |       |       |       |       |       |       |       |       |       |       |       |
| Eotaxin | -0.643 | -0.715 | -0.715 | -0.672 | -0.758 | -0.803 | -0.942 | -0.969 | -0.988  | -0.891 | -0.727 | 0.907  | 1,000   |        |        |        |       |       |       |       |       |       |       |       |       |       |       |
| MCP-1   | -0.497 | -0.580 | -0.580 | -0.530 | -0.630 | -0.685 | -0.868 | -0.910 | -1.000  | -0.958 | -0.837 | 0.967  | 0.984   | 1,000  |        |        |       |       |       |       |       |       |       |       |       |       |       |
| IFNγ    | -0.334 | -0.425 | -0.425 | -0.371 | -0.482 | -0.544 | -0.765 | -0.821 | -0.980  | -0.994 | -0.921 | 0.997  | 0.937   | 0.984  | 1,000  |        |       |       |       |       |       |       |       |       |       |       |       |
| IP-10   | 0.716  | 0.644  | 0.644  | 0.688  | 0.594  | 0.534  | 0.264  | 0.174  | -0.229  | -0.519 | -0.739 | 0.489  | 0.075   | 0.250  | 0.419  | 1,000  |       |       |       |       |       |       |       |       |       |       |       |
| BFGF    | -0.566 | -0.483 | -0.483 | -0.534 | -0.426 | -0.360 | -0.072 | 0.020  | 0.413   | 0.675  | 0.856  | -0.649 | -0.267  | -0.434 | -0.587 | -0.981 | 1,000 |       |       |       |       |       |       |       |       |       |       |
| IL-4    | -0.658 | -0.581 | -0.581 | -0.628 | -0.528 | -0.465 | -0.187 | -0.096 | 0.305   | 0.585  | 0.790  | -0.556 | -0.154  | -0.327 | -0.490 | -0.997 | 0.993 | 1,000 |       |       |       |       |       |       |       |       |       |
| IL-15   | -0.546 | -0.462 | -0.461 | -0.514 | -0.404 | -0.337 | -0.047 | 0.044  | 0.435   | 0.693  | 0.868  | -0.667 | -0.290  | -0.455 | -0.607 | -0.976 | 1,000 | 0.990 | 1,000 |       |       |       |       |       |       |       |       |
| IL-13   | -0.973 | -0.946 | -0.945 | -0.963 | -0.923 | -0.893 | -0.722 | -0.656 | -0.304  | 0.006  | 0.288  | 0.029  | 0.448   | 0.283  | 0.107  | -0.858 | 0.742 | 0.814 | 0.725 | 1,000 |       |       |       |       |       |       |       |
| IL-8    | -0.980 | -0.956 | -0.956 | -0.972 | -0.936 | -0.908 | -0.746 | -0.682 | -0.338  | -0.030 | 0.254  | 0.065  | 0.480   | 0.317  | 0.143  | -0.839 | 0.717 | 0.793 | 0.700 | 0.999 | 1,000 |       |       |       |       |       |       |
| IL-17   | -0.899 | -0.852 | -0.852 | -0.882 | -0.817 | -0.773 | -0.555 | -0.476 | -0.090  | 0.223  | 0.489  | -0.189 | 0.243   | 0.067  | -0.111 | -0.949 | 0.870 | 0.921 | 0.857 | 0.976 | 0.968 | 1,000 |       |       |       |       |       |
| IL-12   | -0.985 | -0.963 | -0.963 | -0.978 | -0.944 | -0.918 | -0.763 | -0.700 | -0.361  | -0.055 | 0.229  | 0.090  | 0.202   | 0.340  | 0.167  | -0.825 | 0.700 | 0.778 | 0.682 | 0.998 | 1,000 | 0.961 | 1,000 |       |       |       |       |
| IL-7    | -0.890 | -0.930 | -0.930 | -0.907 | -0.952 | -0.972 | -0.998 | -0.989 | -0.850  | -0.645 | -0.403 | 0.671  | 0.921   | 0.838  | 0.727  | -0.319 | 0.128 | 0.242 | 0.104 | 0.760 | 0.783 | 0.601 | 0.798 | 1,000 |       |       |       |
| TNFα    | -0.879 | -0.921 | -0.921 | -0.896 | -0.944 | -0.965 | -0.999 | -0.992 | -0.863  | -0.664 | -0.426 | 0.689  | 0.931   | 0.851  | 0.744  | -0.295 | 0.104 | 0.218 | 0.080 | 0.744 | 0.767 | 0.581 | 0.783 | 1,000 | 1,000 |       |       |
| IL-5    | -0.999 | -0.998 | -0.998 | -1.000 | -0.992 | -0.981 | -0.880 | -0.833 | -0.547  | -0.261 | 0.022  | 0.295  | 0.671   | 0.528  | 0.369  | -0.690 | 0.536 | 0.630 | 0.515 | 0.964 | 0.973 | 0.883 | 0.978 | 0.906 | 0.895 | 1,000 |       |
| VEGF    | -1.000 | -0.993 | -0.993 | -0.998 | -0.983 | -0.967 | -0.851 | -0.800 | -0.498  | -0.205 | 0.080  | 0.239  | 0.626   | 0.478  | 0.314  | -0.731 | 0.584 | 0.674 | 0.564 | 0.978 | 0.985 | 0.909 | 0.989 | 0.880 | 0.868 | 0.998 | 1,000 |

HAS

|         | MIP-1β | IL-1ra | IL-7   | IL-6   | IP-10  | GM-CSF | IL-10  | G-CSF  | RANTES | IL-9   | IL-2   | MIP-1α | IL-12  | BFGF   | IL-13  | PDGF-BB | Eotaxin | IL-5  | MCP-1 | VEGF   | IL-8  | IL-4   | IL-15  | IL-17  | TNFα  | IL-1β | IFNγ  |
|---------|--------|--------|--------|--------|--------|--------|--------|--------|--------|--------|--------|--------|--------|--------|--------|---------|---------|-------|-------|--------|-------|--------|--------|--------|-------|-------|-------|
| MIP-1β  | 1.000  |        |        |        |        |        |        |        |        |        |        |        |        |        |        |         |         |       |       |        |       |        |        |        |       |       |       |
| IL-1ra  | 1.000  | 1.000  |        |        |        |        |        |        |        |        |        |        |        |        |        |         |         |       |       |        |       |        |        |        |       |       |       |
| IL-7    | 0.984  | 0.984  | 1.000  |        |        |        |        |        |        |        |        |        |        |        |        |         |         |       |       |        |       |        |        |        |       |       |       |
| IL-6    | 0.968  | 0.968  | 0.997  | 1.000  |        |        |        |        |        |        |        |        |        |        |        |         |         |       |       |        |       |        |        |        |       |       |       |
| IP-10   | 0.889  | 0.889  | 0.957  | 0.976  | 1.000  |        |        |        |        |        |        |        |        |        |        |         |         |       |       |        |       |        |        |        |       |       |       |
| GM-CSF  | 0.944  | 0.944  | 0.869  | 0.830  | 0.688  | 1.000  |        |        |        |        |        |        |        |        |        |         |         |       |       |        |       |        |        |        |       |       |       |
| IL-10   | 0.886  | 0.886  | 0.788  | 0.741  | 0.575  | 0.989  | 1.000  |        |        |        |        |        |        |        |        |         |         |       |       |        |       |        |        |        |       |       |       |
| G-CSF   | 0.867  | 0.867  | 0.763  | 0.714  | 0.542  | 0.963  | 0.999  | 1.000  |        |        |        |        |        |        |        |         |         |       |       |        |       |        |        |        |       |       |       |
| RANTES  | 0.765  | 0.765  | 0.637  | 0.579  | 0.385  | 0.935  | 0.976  | 0.984  | 1.000  |        |        |        |        |        |        |         |         |       |       |        |       |        |        |        |       |       |       |
| IL-9    | 0.661  | 0.661  | 0.515  | 0.451  | 0.244  | 0.872  | 0.934  | 0.947  | 0.989  | 1.000  |        |        |        |        |        |         |         |       |       |        |       |        |        |        |       |       |       |
| IL-2    | 0.569  | 0.569  | 0.411  | 0.344  | 0.129  | 0.809  | 0.885  | 0.903  | 0.965  | 0.993  | 1.000  |        |        |        |        |         |         |       |       |        |       |        |        |        |       |       |       |
| MIP-1α  | 0.325  | 0.325  | 0.149  | 0.077  | -0.144 | 0.619  | 0.726  | 0.753  | 0.858  | 0.924  | 0.963  | 1.000  |        |        |        |         |         |       |       |        |       |        |        |        |       |       |       |
| IL-12   | 0.409  | 0.408  | 0.237  | 0.166  | -0.055 | 0.687  | 0.785  | 0.809  | 0.900  | 0.955  | 0.983  | 0.996  | 1.000  |        |        |         |         |       |       |        |       |        |        |        |       |       |       |
| BFGF    | -0.057 | -0.057 | -0.236 | -0.306 | -0.508 | 0.276  | 0.412  | 0.449  | 0.599  | 0.712  | 0.789  | 0.926  | 0.888  | 1.000  |        |         |         |       |       |        |       |        |        |        |       |       |       |
| IL-13   | -0.027 | -0.027 | -0.207 | -0.278 | -0.482 | 0.305  | 0.439  | 0.475  | 0.623  | 0.732  | 0.807  | 0.937  | 0.901  | 1.000  | 1.000  |         |         |       |       |        |       |        |        |        |       |       |       |
| PDGF-BB | -0.440 | -0.440 | -0.595 | -0.652 | -0.803 | -0.119 | 0.026  | 0.066  | 0.241  | 0.383  | 0.488  | 0.706  | 0.640  | 0.921  | 0.910  | 1.000   |         |       |       |        |       |        |        |        |       |       |       |
| Eotaxin | -0.733 | -0.732 | -0.598 | -0.538 | -0.339 | -0.916 | -0.965 | -0.974 | -0.999 | -0.995 | -0.977 | -0.882 | -0.921 | -0.638 | -0.661 | -0.289  | 1.000   |       |       |        |       |        |        |        |       |       |       |
| IL-5    | -0.670 | -0.670 | -0.525 | -0.462 | -0.255 | -0.878 | -0.938 | -0.951 | -0.991 | -1.000 | -0.992 | -0.920 | -0.951 | -0.703 | -0.724 | -0.372  | 0.996   | 1.000 |       |        |       |        |        |        |       |       |       |
| MCP-1   | -0.903 | -0.903 | -0.811 | -0.766 | -0.606 | -0.994 | -0.999 | -0.997 | -0.967 | -0.919 | -0.867 | -0.700 | -0.761 | -0.377 | -0.405 | 0.012   | 0.954   | 0.924 | 1.000 |        |       |        |        |        |       |       |       |
| VEGF    | -0.994 | -0.994 | -0.957 | -0.933 | -0.831 | -0.975 | -0.933 | -0.918 | -0.833 | -0.742 | -0.658 | -0.430 | -0.509 | -0.057 | -0.086 | 0.336   | 0.805   | 0.749 | 0.946 | 1.000  |       |        |        |        |       |       |       |
| IL-8    | -0.984 | -0.984 | -0.936 | -0.908 | -0.794 | -0.987 | -0.954 | -0.941 | -0.867 | -0.784 | -0.705 | -0.487 | -0.564 | -0.121 | -0.150 | 0.274   | 0.841   | 0.791 | 0.965 | 0.998  | 1.000 |        |        |        |       |       |       |
| IL-4    | -0.754 | -0.754 | -0.860 | -0.895 | -0.971 | -0.495 | -0.364 | -0.326 | -0.154 | -0.006 | 0.111  | 0.376  | 0.291  | 0.699  | 0.677  | 0.922   | 0.105   | 0.017 | 0.399 | 0.675  | 0.626 | 1.000  |        |        |       |       |       |
| IL-15   | -0.856 | -0.856 | -0.935 | -0.958 | -0.998 | -0.637 | -0.519 | -0.484 | -0.322 | -0.178 | -0.061 | 0.211  | 0.122  | 0.565  | 0.540  | 0.841   | 0.275   | 0.189 | 0.551 | 0.792  | 0.751 | 0.985  | 1.000  |        |       |       |       |
| IL-17   | -0.899 | -0.900 | -0.964 | -0.980 | -1.000 | -0.705 | -0.595 | -0.562 | -0.407 | -0.267 | -0.152 | 0.121  | 0.031  | 0.487  | 0.461  | 0.788   | 0.361   | 0.278 | 0.625 | 0.844  | 0.808 | 0.965  | 0.996  | 1.000  |       |       |       |
| TNFα    | -0.089 | -0.088 | 0.092  | 0.165  | 0.377  | -0.413 | -0.540 | -0.573 | -0.709 | -0.806 | -0.870 | -0.971 | -0.945 | -0.989 | -0.993 | -0.855  | 0.743   | 0.799 | 0.508 | 0.201  | 0.264 | -0.587 | -0.440 | -0.356 | 1.000 |       |       |
| IL-1β   | 0.064  | 0.065  | 0.243  | 0.313  | 0.514  | -0.269 | -0.405 | -0.442 | -0.593 | -0.706 | -0.784 | -0.923 | -0.884 | -1.000 | -0.999 | -0.924  | 0.632   | 0.698 | 0.370 | 0.049  | 0.113 | -0.704 | -0.572 | -0.494 | 0.988 | 1.000 |       |
| IFNγ    | 0.173  | 0.173  | 0.348  | 0.415  | 0.605  | -0.162 | -0.303 | -0.341 | -0.502 | -0.625 | -0.712 | -0.875 | -0.828 | -0.993 | -0.989 | -0.961  | 0.544   | 0.616 | 0.267 | -0.060 | 0.004 | -0.777 | -0.658 | -0.586 | 0.966 | 0.994 | 1.000 |

HAS+ HA

|         | MIP-1β | IL-1β  | IFNγ   | IL-8   | IL-1ra | IL-10  | G-CSF  | GM-CSF | RANTES | MIP-1α | IL-9   | IL-6   | PDGF-BB | IL-12  | BFGF   | VEGF   | IL-5   | IL-7   | IL-13  | IL-4   | Eotaxin | IL-15  | IL-17  | MCP-1  | TNFα   | IL-2  | IP-10 |
|---------|--------|--------|--------|--------|--------|--------|--------|--------|--------|--------|--------|--------|---------|--------|--------|--------|--------|--------|--------|--------|---------|--------|--------|--------|--------|-------|-------|
| MIP-1β  | 1.000  |        |        |        |        |        |        |        |        |        |        |        |         |        |        |        |        |        |        |        |         |        |        |        |        |       |       |
| IL-1β   | 0.934  | 1.000  |        |        |        |        |        |        |        |        |        |        |         |        |        |        |        |        |        |        |         |        |        |        |        |       |       |
| IFNγ    | 0.923  | 1.000  | 1.000  |        |        |        |        |        |        |        |        |        |         |        |        |        |        |        |        |        |         |        |        |        |        |       |       |
| IL-8    | 0.997  | 0.905  | 0.892  | 1.000  |        |        |        |        |        |        |        |        |         |        |        |        |        |        |        |        |         |        |        |        |        |       |       |
| IL-1ra  | 0.536  | 0.199  | 0.170  | 0.596  | 1.000  |        |        |        |        |        |        |        |         |        |        |        |        |        |        |        |         |        |        |        |        |       |       |
| IL-10   | -0.039 | -0.394 | -0.421 | 0.034  | 0.823  | 1.000  |        |        |        |        |        |        |         |        |        |        |        |        |        |        |         |        |        |        |        |       |       |
| G-CSF   | -0.058 | -0.412 | -0.439 | 0.015  | 0.811  | 1.000  | 1.000  |        |        |        |        |        |         |        |        |        |        |        |        |        |         |        |        |        |        |       |       |
| GM-CSF  | 0.105  | -0.258 | -0.287 | 0.177  | 0.896  | 0.990  | 0.987  | 1.000  |        |        |        |        |         |        |        |        |        |        |        |        |         |        |        |        |        |       |       |
| RANTES  | -0.334 | -0.649 | -0.671 | -0.264 | 0.617  | 0.955  | 0.960  | 0.902  | 1.000  |        |        |        |         |        |        |        |        |        |        |        |         |        |        |        |        |       |       |
| MIP-1α  | -0.559 | -0.819 | -0.836 | -0.497 | 0.400  | 0.850  | 0.860  | 0.766  | 0.968  | 1.000  |        |        |         |        |        |        |        |        |        |        |         |        |        |        |        |       |       |
| IL-9    | -0.662 | -0.886 | -0.900 | -0.605 | 0.278  | 0.775  | 0.787  | 0.676  | 0.928  | 0.992  | 1.000  |        |         |        |        |        |        |        |        |        |         |        |        |        |        |       |       |
| IL-6    | -0.800 | -0.962 | -0.969 | -0.754 | 0.078  | 0.631  | 0.646  | 0.513  | 0.833  | 0.945  | 0.979  | 1.000  |         |        |        |        |        |        |        |        |         |        |        |        |        |       |       |
| PDGF-BB | -0.905 | -0.997 | -0.999 | -0.871 | -0.126 | 0.461  | 0.478  | 0.329  | 0.704  | 0.859  | 0.918  | 0.979  | 1.000   |        |        |        |        |        |        |        |         |        |        |        |        |       |       |
| IL-12   | -0.439 | -0.089 | -0.059 | -0.504 | -0.994 | -0.880 | -0.871 | -0.939 | -0.700 | -0.499 | -0.383 | -0.188 | 0.015   | 1.000  |        |        |        |        |        |        |         |        |        |        |        |       |       |
| BFGF    | -0.226 | 0.138  | 0.167  | -0.296 | -0.943 | -0.965 | -0.959 | -0.992 | -0.843 | -0.681 | -0.581 | -0.404 | -0.211  | 0.974  | 1.000  |        |        |        |        |        |         |        |        |        |        |       |       |
| VEGF    | -0.146 | 0.218  | 0.247  | -0.218 | -0.913 | -0.983 | -0.979 | -0.999 | -0.884 | -0.738 | -0.645 | -0.477 | -0.289  | 0.953  | 0.997  | 1.000  |        |        |        |        |         |        |        |        |        |       |       |
| IL-5    | -0.320 | 0.040  | 0.069  | -0.389 | -0.971 | -0.934 | -0.927 | -0.976 | -0.786 | -0.606 | -0.498 | -0.312 | -0.114  | 0.992  | 0.995  | 0.984  | 1.000  |        |        |        |         |        |        |        |        |       |       |
| IL-7    | 0.099  | 0.448  | 0.475  | 0.026  | -0.787 | -0.998 | -0.999 | -0.979 | -0.971 | -0.880 | -0.811 | -0.676 | -0.513  | 0.851  | 0.947  | 0.970  | 0.911  | 1.000  |        |        |         |        |        |        |        |       |       |
| IL-13   | 0.264  | 0.592  | 0.615  | 0.193  | -0.673 | -0.974 | -0.978 | -0.932 | -0.997 | -0.947 | -0.898 | -0.790 | -0.649  | 0.751  | 0.880  | 0.916  | 0.829  | 0.986  | 1.000  |        |         |        |        |        |        |       |       |
| IL-4    | 0.184  | 0.524  | 0.549  | 0.112  | -0.731 | -0.989 | -0.992 | -0.958 | -0.988 | -0.918 | -0.859 | -0.737 | -0.585  | 0.802  | 0.916  | 0.945  | 0.872  | 0.996  | 0.997  | 1.000  |         |        |        |        |        |       |       |
| Eotaxin | 0.417  | 0.715  | 0.735  | 0.350  | -0.543 | -0.924 | -0.931 | -0.860 | -0.996 | -0.987 | -0.958 | -0.879 | -0.765  | 0.633  | 0.791  | 0.838  | 0.727  | 0.945  | 0.987  | 0.970  | 1.000   |        |        |        |        |       |       |
| IL-15   | 0.439  | 0.731  | 0.751  | 0.372  | -0.523 | -0.915 | -0.923 | -0.848 | -0.994 | -0.980 | -0.964 | -0.890 | -0.780  | 0.614  | 0.776  | 0.825  | 0.710  | 0.937  | 0.982  | 0.964  | 1.000   | 1.000  |        |        |        |       |       |
| IL-17   | 0.382  | 0.687  | 0.709  | 0.313  | -0.575 | -0.938 | -0.945 | -0.879 | -0.999 | -0.980 | -0.946 | -0.860 | -0.739  | 0.662  | 0.814  | 0.859  | 0.753  | 0.957  | 0.992  | 0.979  | 0.999   | 0.998  | 1.000  |        |        |       |       |
| MCP-1   | 0.710  | 0.915  | 0.927  | 0.657  | -0.213 | -0.731 | -0.744 | -0.626 | -0.901 | -0.981 | -0.998 | -0.991 | -0.942  | 0.320  | 0.525  | 0.593  | 0.439  | 0.771  | 0.866  | 0.823  | 0.936   | 0.944  | 0.922  | 1.000  |        |       |       |
| TNFα    | 0.737  | 0.930  | 0.941  | 0.686  | -0.175 | -0.704 | -0.717 | -0.595 | -0.883 | -0.972 | -0.994 | -0.995 | -0.955  | 0.283  | 0.492  | 0.561  | 0.404  | 0.745  | 0.846  | 0.800  | 0.922   | 0.931  | 0.906  | 0.999  | 1.000  |       |       |
| IL-2    | 0.791  | 0.520  | 0.495  | 0.834  | 0.940  | 0.580  | 0.564  | 0.691  | 0.312  | 0.064  | -0.065 | -0.266 | -0.456  | -0.897 | -0.774 | -0.720 | -0.833 | -0.530 | -0.381 | -0.455 | -0.225  | -0.202 | -0.263 | 0.132  | 0.171  | 1.000 |       |
| IP-10   | 0.651  | 0.336  | 0.308  | 0.705  | 0.990  | 0.733  | 0.720  | 0.823  | 0.498  | 0.265  | 0.138  | -0.065 | -0.266  | -0.968 | -0.886 | -0.846 | -0.928 | -0.691 | -0.560 | -0.626 | -0.418  | -0.396 | -0.453 | -0.072 | -0.033 | 0.979 | 1.000 |
